# Supplementary material for: Ca2+ sensor synaptotagmin-1 mediates exocytosis in mammalian photoreceptors
Source: eLife. 2019 Jun 7;8:e45946. doi: 10.7554/eLife.45946 (PMC6588344; doi:10.7554/eLife.45946)
Supplement: Figure 9—source data 1. — Data for Figure 9D. Density of cone terminals per 0.01 mm2 in control and ConeSyt1CKO retinas. [file elife-45946-fig9-data1.xlsx]

## Sheet: Fig 1
	Data related to:	Grassmeyer, et al.
		Ca2+ sensor synaptotagmin-1 mediates exocytosis in mammalian photoreceptors
		Cell
	[Ca2+]	1	2	3	4	5	6	7	8	9	10	11	12	13	14	15	16	17
	10	506.34	604	762.22	392.74	266.92	411.78	350.36	302.33	540.34	471.39	513.23	308.36	223.43	290.62	443.45	584.32	792.38
	5	496.16	548	705.84	376	262	402	316.86	291	499	444.61	464.1	283.27	197.65	253.9	416.41	532.95	746
	2	378.3	410	615.6	303	201	290.34	235.9	238.36	398.22	312.39	371.07	245.64	148.43	202.34	324.48	420	588.74
	1	158.1	225.51	261.59	132.9	77	147.9	86.54	92.9	185.74	107.34	173.52	107.66	74.21	97	178.42	170.16	233.84
	0.1	39.07	45.1	43.2	46	22.7	48.8	22.33	21	33	11.07	26.78	29.3	37	21	14	30	48

## Sheet: Fig 3
	Data related to:	Grassmeyer, et al.
		Ca2+ sensor synaptotagmin-1 mediates exocytosis in mammalian photoreceptors
	Fig. 3B, b-waves	log10 light attenuation
		-5.42	-4.92	-4.28	-3.92	-3.28	-2.78	-2.14	-1.14	0
Control retina b-wave (μV)	1	13	40.3	181.6	286	714	924	1165	1750	2124
	2	11.1	33.4	174	252	572	838	924	914	1157
	3	0	26	94.4	197	341	372	520	803	980
	4	3.8	10	42.2	78.3	96.8	118.3	189.5	226.3	249.5
	5	0	5.4	86.9	177	404.1	357.7	408.7	537.2	802.1
	6	0	12.3	75.5	137	194	239	330	431.6	494
	7	6.3	21.9	54	88.1	99	127	211	325	344
	8	3.1	9.8	48.9	99.2	170.3	189	230	282	356
	9	10.3	31	84.9	173.1	336	362.4	375.1	453	532
	10	5.3	11	47.5	67.2	102.9	106.3	130.1	195.4	229
	11	10.1	48.2	222	303	415	497	747	1105	1287
		log10 light attenuation
		-5.42	-4.92	-4.28	-3.92	-3.28	-2.78	-2.14	-1.14	0
Rod retina b-wave (μV)	1	0	0	0	0	13.4	42.2	162	310	533
	2	0	4.3	20.2	46.4	90.2	153	235	439	511
	3	0	0	0	6.3	25.9	26.4	107.4	253	207
	4	0	0	0	0	0	0	42.5	161	449
	5	0	5.3	24.7	27.8	54	89.2	164	242	287
	6	0	0	0	0	0	23.9	75.6	213
	7	0	0	0	0	14.9	34.5	80.2	387	397
	8	0	0	0	0	20.8	29.4	58.5	227	389
		log10 light attenuation
		-5.42	-4.92	-4.28	-3.92	-3.28	-2.78	-2.14	-1.14	0
Cone retina b-wave (μV)	1	22.5	108.3	163.4	191	163.8	144		98	310.6
	2	10.2	33.7	170.9	293.7	418	406	475	653	594
	3	0	6.1	33.7	71	108.1	205.7	138.5	186	232.1
	4	3.6	11.6	57.4	93.5	128.6		123.5	216	235
	5	12.9	13.2	20.3	45.1	64.2	69.1	84.2	133.2	125
	6	16.5	27.5	181		338		480	493	401
	7	17.7	54.4	162	258	357		530	464	425
	8	7.2	19.5	83.4	143.2	270		398	468	509
	Fig. 3C, a-waves	log10 light attenuation
		-5.42	-4.92	-4.28	-3.92	-3.28	-2.78	-2.14	-1.14	0
Control retina a-wave (μV)	1	0	0	0	0	19	35	132	344	414
	2	0	0	0	0	0	11.3	47.6	94	167
	3	0	0	0	0	0	14	78	177	380
	4	0	0	0	6.6	12.8	39.4	84.6	154.7	184.6
	5	0	0	0	13.3	15.7	31.8	66	170	404.7
	6	0	0	0	0	0	17.7	77.3	168.4	247
	7	0	0	0	0	2	7.7	33.2	144	165
	8	0	0	0	0	5.5	14.2	53.3	122	173
	9	0	0	0	0	8.1	20.1	44.5	131.8	205
	10	0	0	0	0	5.8	8.3	41.7	96.2	128.9
	11	0	0	5.3	12	35.4	68	154	325	464
		log10 light attenuation
		-5.42	-4.92	-4.28	-3.92	-3.28	-2.78	-2.14	-1.14	0
Rod retina a-wave (μV)	1	0	0	0	0	48.4	105	177	260	412
	2	0	0	10.2	7.8	63.7	113	148	314	312
	3	0	0	0	0	35.7	88	159	257	355
	4	0	0	0	0	0	89.3	128	147	244
	5	0	0	0	0	13.7	45.1	69.8	173	211
	6	0	0	0	16	32.2	89	142	243
	7	0	0	0	0	14.2	33	85.3	214	295
	8	0	0	0	0	26.9	79.4	106.2	157	281
		log10 light attenuation
		-5.42	-4.92	-4.28	-3.92	-3.28	-2.78	-2.14	-1.14	0
Cone retina a-wave (μV)	1	0	8.7		12	18.5	64		263	284
	2	0	0	0	6.1	12	47	142	362	449
	3	0	0	0	0	21.1	31.8	42.8	131.5	145.7
	4	0	0	0	0	10.1	22.5	51.2	193	223
	5	4.4	14.7	7.6	5	56.2	14.1	82.3	147.2	156
	6	0	0	50.2		86.7		185	317	347
	7	0	0	18.4	20.8	25.7		87.4	247	303
	8	0	0	14.9	20.2	34		88.2	170	185
	Fig. 3D, isolated photoreceptor responses
		log10 light attenuation
		-5.42	-4.28	-3.28	-2.14	-1.14	0
Control retina responses (μV)	1	13.2	79.8	54.6	121.3	158.7	204.7
	2	0	13.9	24.6	102.1	138.5	159
	3	0	70.2	120.2	228	233	255
	4	23.6	68	91.6	191	166	230
		15.8	78.6	98.4	215.7	207.6	302.4
		log10 light attenuation
		-5.42	-4.28	-3.28	-2.14	-1.14	0
Rod retina responses (μV)	1	4	28.8	36.7	94.8	118	132.8
	2	0	17.7	32	101	107.5	181
	3	12.9	59.2	51	215	228	253
	4	0	38.1	23.2	92.2	102.8	131.8
	5	0	44.6	30.8	85.4	127	177

## Sheet: Fig 4
	Data related to:	Grassmeyer, et al.
		Ca2+ sensor synaptotagmin-1 mediates exocytosis in mammalian photoreceptors
	Fig. 4C	log10 light attenuation
		-4.28	-3.28	-2.14	-1.14	0
Control retina b-wave ratio	1		0.513357	0.192308	0.23533	0.23795
	2	0.865979	0.731073	0.280551	0.299922	0.213864
	3	0.76776	0.612022	0.362329	0.307143	0.235514
	4	0.733887	0.858752	0.305676	0.28254	0.216216
	5	0.725146	0.530969	0.285167	0.159353	0.061728
	6	0.766611	0.550685	0.289474		0.093606
	7	0.754139	0.573714	0.122348	0.165517	0.10848
	8	0.734043	0.51751	0.04021	0.056313	0
	9	0.771429	0.610641	0.228163	0.271916	0.122096
	10	0.769797	0.681934	0.289011	0.262393	0.315088
	11	0.763514	0.751269	0.269274	0.247619
	12	0.761373	0.580379	0.314218	0.229021	0.067029
	13	0.583955	0.298831	0.257955	0.304029	0.117446
		log10 light attenuation
		-4.28	-3.28	-2.14	-1.14	0
RodSyt1CKO retina b-wave ratio	1	1.21541	1.0198	0.564784	0.551813	0.113086
	2		1.12112	0.626604
	3			0.532348
	4	1.32979	1.32887	0.432597	0.361538
	5			0.670175	0.5
	6		0.981844	0.714751		0.248649
	7				0.476006	0.338253
	8				0.620091	0.263689
	9					0.39272
	10				0.669271
		log10 light attenuation
		-4.28	-3.28	-2.14	-1.14	0
ConeSyt1CKO retina b-wave ratio	1		0.49569	0	0	0
	2	0.236977	0.092327
	3	0.550738	0.432927	0.087778	0.082692	0.027778
	4	0.561644	0.344795	0.092827	0.038325	0.069466
	5	0.23268	0.183738	0.165083	0.112613
	6	0.553699	0.397209	0.014834	0.01919	0.005584
	7	0.554896	0.253846	0	0	0
	8	0.554867	0.266434	0.085047		0
	9					0
	Fig. 4D	log10 light attenuation
		-2.14	-1.14	0
Control retina a-wave ratio	1	0.118355	0.116803	0.122427
	2	0.196491	0.211268	0.123552
	3	0.23871	0.204332	0.190593
	4	0.275498	0.117308	0.112879
	5	0.450317	0.379079	0.238095
	6	0.234097		0.2
	7	0.151852	0.19771	0.123926
	8	0.164482	0.150262	0.093548
	9	0.413793	0.201873	0.118219
	10	0.180628	0.160742	0.282918
	11	0.113839	0.131373
	12	0.146667	0.140678	0.06129
	13	0.142515	0.1325	0.071468
		log10 light attenuation
		-2.14	-1.14	0
RodSyt1CKO retina a-wave ratio	1	0.263158	0.211111	0.280528
	2	0.258667
	3	0.290698
	4	0.166667	0.176761	0.117816
	5	0.225389	0.196676
	6	0.238318		0.178161
	7		0.178899	0.163717
	8		0.310788	0.155587
	9			0.160643
	10		0.201954
		log10 light attenuation
		-2.14	-1.14	0
ConeSyt1CKO retina a-wave ratio	1	0.2	0.202128	0.16351
	2	0.280882	0.438182	0.320261
	3	0.257198	0.245729	0.193258
	4	0.404617	0.340353
	5	0.050549	0.157692	0.130512
	6	0.159211	0.21134	0.044477
	7	0.160938		0.106471
	8			0.311354

## Sheet: Fig 5
		Data related to:	Grassmeyer, et al.
			Ca2+ sensor synaptotagmin-1 mediates exocytosis in mammalian photoreceptors
		Fig. 5F
			Control	+HEPES	Washout		ConeSyt1CKO
Inhibition (pA)		1	26	3.5	17		0
		2	28	4			0
		3	14	3	13		0
		4	33	1	23		0
		5	16.5	2.5	5

## Sheet: Fig 6
		Data related to:	Grassmeyer, et al.
			Ca2+ sensor synaptotagmin-1 mediates exocytosis in mammalian photoreceptors
			Fig. 6C
				step duration
				2 ms	5 ms	25 ms
	Cone control IA(Glu) amplitude (pA)		1	11.9	32	46.2
			2		25.2	24
			3	56.8	72.2	55.9
			4	27.5	51.9	68.5
			5	17.9	74.6	45.9
			6	12.4	38	38.9
			7		28.2	28.7
			8			73.7
			9	5.5	24.1	31.4
			10		76.4	107.1
			11		56.8
			12		40.9
			13	55.1	53.1	55.5
			14
			15			18
			16		22.7
			17		78	76.4
			18		40.9
				step duration
				2 ms	5 ms	25 ms
	ConeSyt1CKO IA(Glu) amplitude (pA)		1		0	0
			2	0	2.4	7.2
			3	0	0	0
			4	0	0	0
			5	0	0	0
			6	0	0	0
			7	0	4.6	3.2
			8	6.9		7.9
			9		0	9
					step duration
					5 ms	25 ms
	Cone control +TBOA IA(Glu) amplitude (pA)		1		14.3	8.5
			2		0	0
			3		3.2	4.6
			4
			5		4	0
			6		2	3
			Fig. 6D
				step duration
				5 ms	25 ms	500 ms
	Rod control IA(Glu) amplitude (pA)		1	1	3	19
			2	12	8	5
			3	7	11
			4	3	1	4
			5	11	7	17
			6	4	5	14
			7	13	15.6	48
			8	25	9	15
			9	3	5	19
			10	4	8	26
			11	4	5	18
			12	6	11	22
			13	19	19	22
			14	10	7	11
			15	6	8	16
			16	10	12	43
			17	0.5	3.8	7.2
			18	24.7	30.2	10.7
			19	8.1	11.4	9.8
				step duration
				5 ms	25 ms	500 ms
	Rod Syt1CKO IA(Glu) amplitude (pA)		1	0	3	27
			2	5	7	73
			3	0	4	7
			4	0	2	17
			5	4	8	9
			6	0	11.4	97
			7	0	2.4	29
			8	0	0	18
			9	0	2.5
			10	1	2	30
			11	0	1	17
			12	0	2	17
			13	0	0	8
			14	0	0	0
			15	1	1.4	10
			16	0	0	25
			17	0	2.5	12.4
			18	1.7	6	29
			19	0	35	19
			20	3.5	3.5	59
			21	7.6	29.6	0
			22	2.3	0	0
			23	3.7		8.9
			24	0	0	20
			25	0	0	18.3
			26	0	0	16
			27		3.5	16
				step duration
				5 ms	25 ms	500 ms
	Rod Syt1CKO + TBOA IA(Glu) amplitude (pA)		1	0	0	0
			2	0	0	0
			3	0	0	10
			4	0	4	4
			5		3	48
			6		0	0
			7	0	0	0
			8	3.5	3.7	32

## Sheet: Fig 7
		Data related to:	Grassmeyer, et al.
			Ca2+ sensor synaptotagmin-1 mediates exocytosis in mammalian photoreceptors
			Fig. 7A
				mini parameters per cell
				frequency (Hz)	mean	SEM	n (events)
	Cone control minis		1	6.56	6.099	0.1341	125
			2	4.5	9.317	0.2916	117
			3	6.27	10.39	0.3097	201
			4	5.39	17.51	0.5906	219
			5	9.97	12.62	0.4206	194
			6	1.54	10.24	0.7073	107
			7	6.5	9.455	0.3201	131
				mini parameters per cell
				frequency (Hz)	mean	SD	n (events)
	ConeSyt1CKO minis		1	6.54	6.657	0.1313	134
			2	9.52	12.94	0.4208	178
			3	5.76	8.287	0.2417	160
			4	3.43	4.848	0.153	80
			5	4.39	6.942	0.2048	185
			6	10.34	5.245	0.1234	135
			7	1.62	5.096	0.3742	35
			8	11.32	11.37	0.6264	140
			9	6.33	8.492	0.2288	266
			Fig. 7B
				mini parameters per cell
				frequency (Hz)	mean	SEM	n (events)
	Rod control minis		1	1.8667	9.47	0.226	25
			2	0.233	10.54	1.27986	8
			3	0.333	5.924	0.346482	18
			4	0.5	5.66	0.237171	10
			5	0.46666	6.219	0.161555	29
			6	0.53333	5.16	0.282181	19
			7	0.16666	5.3	0.219135	5
			8	0.292	3.14	0.261916	14
			9	0.9	12.4	0.787096	5
			10	0.33	3.32	0.10961	7
			11	3.22	5.51	0.525476	20
			12	0.8111	5.68	0.179073	73
			13	0.066667	7.99	1.15966	2
			14	2.43	5.616	0.25632	73
				mini parameters per cell
				frequency (Hz)	mean	SD	n (events)
	Rod Syt1CKO minis		1	8.29268	5.8	0.182414	44
			2	3.21429	8.7	0.288617	17
			3	8.4058	6.08	0.222533	19
			4	0.444444	4.45	1.17	4
			5	5.82524	6.55	0.217774	39
			6	5.405	6.67	0.372678	45

## Sheet: Fig 8
		Data related to:	Grassmeyer, et al.
			Ca2+ sensor synaptotagmin-1 mediates exocytosis in mammalian photoreceptors
			Fig. 8B, 8D
				Test potential
				-60	-50	-40	-30	-20	-10	0	10	20		V0.5 (mV)
Cone control Qca (fC)			1	37.6914	-19.4042	-289.21	-1171.34	-1270.96	-1314.19	-985.13	-756.793	-441.647		-33.51
			2	-25.1153	-116.835	-671.527	-1194.99	-1164.48	-958.277	-713.648	-385.353	-113.818		-39.27
			3	-13.2246	-72.8666	-325.232	-955.661	-1123.19	-1065.69	-842.712	-490.973	-230.149		-33.54
			4	-6.59478	-121.6	-686.877	-2079.47	-2099.3	-1687.41	-1125.91	-554.58	-55.5631		-36.63
			5	-71.2224	-7.17098	-256.995	-1098.17	-1619.26	-1471.77	-1058.85	-798.051	-413.574		-30.95
			6	-40.4142	-105.987	-326.272	-1516.55	-1735	-2167.02	-1258.02	98.9319	604.504		-33.81
			7	33.2533	27.0673	-217.506	-1044.48	-1074.36	-751.183	-384.916	103.062	225.375		-36.18
			8	48.8454	-74.7395	-360.969	-763.659	-1418.82	-1323.27	-1079.42	-643.639	-177.35		-32.11
			9	6.50494	-3.4933	-164.334	-671.089	-1617.88	-1429.4	-1156.2	-690.051	-227.123		-31.63
			10	-59.7011	-80.1169	-383.38	-866.779	-1653.31	-1744.12	-1401.97	-938.547	-423.021		-26.08
			11	-61.9863	6.68535	-217.545	-1061.73	-1617.26	-1504.27	-1165.48	-897.248	-672.65		-30.44
			12	-47.4277	-97.9689	-468.235	-1469.75	-1686.37	-1525.54	-912.175	-392.716	80.707		-34.18
				Test potential
				-60	-50	-40	-30	-20	-10	0	10	20		V0.5 (mV)
Cone Syt1CKO Qca (fC)			1	27.8712	-79.9329	-123.643	-1055.5	-2379.09	-2357.64	-2305.88	-1525.65	-1398.47		-27.14
			2	0.399055	-44.8429	-294.376	-1720.43	-1763.85	-1619.89	-1332.29	-989.049	-657.677		-34.42
			3	13.0395	2.36604	-20.3411	-1532.94	-1772.89	-1644.18	-1362.88	-1208.62	-1098.64		-31.82
			4	-16.7219	-73.2517	-323.774	-1627.68	-1697.07	-1434.07	-1099.12	-637.83	189.62		-34.9
			5	-15.9804	-147.532	-557.514	-624.251	-560.027	-260.211	-204.723	-12.4431	241.25		-44.56
			6	13.1705	-63.7278	-216.334	-1933.09	-2098.29	-1689.8	-1285.87	-951.791	-779.126		-33.93
			7	-22.9687	-67.1969	-177.667	-1128.84	-1548.33	-1384.93	-1026.47	-633.422	-279.09		-31.62
			Fig. 8D
				Amplitude (pA)	V0.5 (mV)
Cone control ICa			1	27.8	-37.84
			2	17.8	-37.64
			3	27.3	-39.06
			4	38.6	-34.12
			5	32.2	-39.49
			6	28	-35.59
			7	50.4	-39.62
			8	37.4	-36.31
			9	27.8	-37.84
			10	46.9	-38.22
			11	28.4	-31.32
			12	34.5	-31.61
				Amplitude (pA)	V0.5 (mV)
Cone Syt1CKO Ica			1	51.6	-35.72
			2	51.8	-41.88
			3	37.5	-39.4
			4	53	-35.97
			5	50.6	-42.23
			6	31.1	-40.23
			7	43	-37.59
			8	16.9
			9	54.6	-36.15
			10	40.3	-36.37
			11	28.9	-37.76
			12	50.2	-43.47
			Fig. 8F
				Amplitude (pA)
Rod control Ica			1	4.8
			2	1.2
			3	3.6
			4	2.5
			5	5.5
			6	7
			7	7.5
				Amplitude (pA)
Rod Syt1CKO Ica			1	4.9
			2	0.8
			3	5
			4	0.9
			5	2
			6	11.4
			7	5.7
			8	4.4
			9	3.9
			10	4.4
			11	2.5

## Sheet: Fig 9
		Data related to:	Grassmeyer, et al.
			Ca2+ sensor synaptotagmin-1 mediates exocytosis in mammalian photoreceptors
		Fig. 9C
			Cone control	ConeSyt1CKO	Rod control	RodSyt1CKO
INL (mm)		1	47.48	46.47	46.84	35.03
		2	32.68	31.995	52.02	36.54
		3	46.73	38.625	31.22	41.845
		4	49.395	52.525	43.355	33.29
		5	53.26			33.35
		6	50.58
		7	40.7367
			Cone control	ConeSyt1CKO	Rod control	RodSyt1CKO
OPL (mm)		1	5.54	5.18	5.37	4.595
		2	5.81	5.84	5.285	5.28
		3	5.65	5.735	5.87	4.96667
		4	5.2	6.355	6.4	6.12
		5	5.705	4.54		5.745
			Cone control	ConeSyt1CKO	Rod control	RodSyt1CKO
ONL (mm)		1	54.915	43.53	53.45	46.5814
		2	47.2433	45.065	54.44	45.62
		3	61.075	60.515	38.34	47.095
		4	42.785	49.015	52.245	54.265
		5	56.355			46.915
		6	58.77
		Fig. 9D
			mean	SEM	n (regions counted)
Cone control terminal density		1	155	14.5488	4
		2	115.5	7.5	2
		3	142.25	15.955	4
		4	116.2	9.63016	5
ConeSyt1CKO terminal density		1	127	2.94392	4
		2	117	5.33854	4
		3	128.75	7.38664	4
		4	115.75	6.00521	4
		5	122	13.1403	4
